# ARG-miner: A web platform for crowdsourcing-based curation of antibiotic resistance genes

G. A. Arango-Argoty<sup>1</sup>, G. K. P. Guron<sup>2,3</sup>, E. Garner<sup>2</sup>, M.V. Riquelme<sup>2</sup>, L. S. Heath<sup>1</sup>, A. Pruden<sup>2</sup>,  
P. Vikesland<sup>2</sup>, and L. Zhang<sup>1\*</sup>

<sup>1</sup>Department of Computer Science, Virginia Tech, Blacksburg, VA, USA

<sup>2</sup>Department of Civil and Environmental Engineering, Virginia Tech, Blacksburg, VA, USA

<sup>3</sup>Department of Food Science and Technology, Virginia Tech, Blacksburg, VA, USA

\* Corresponding author (lqzhang@vt.edu)

## ABSTRACT

Curation of antibiotic resistance gene (ARG) databases is a labor-intensive process that requires expert knowledge to manually collect, correct, and/or annotate individual genes. Correspondingly, updates to existing databases tend to be infrequent, commonly requiring years for completion and often containing inconsistencies. Further, because of limitations of manual curation, most existing ARG databases contain only a small proportion of known ARGs (~5k genes). A new approach is needed to achieve a truly comprehensive ARG database, while also maintaining a high level of accuracy. Here we propose a new web-based curation system, ARG-miner, which supports annotation of ARGs at multiple levels, including: gene name, antibiotic category, resistance

25 mechanism, and evidence for mobility and occurrence in clinically-important bacterial  
26 strains. To overcome limitations of manual curation, we employ crowdsourcing as a  
27 novel strategy for expanding curation capacity towards achieving a truly comprehensive,  
28 up-to-date database. We develop and validate the approach by comparing  
29 performance of multiple cohorts of curators with varying levels of expertise,  
30 demonstrating that ARG-miner is more cost effective and less time-consuming relative  
31 to traditional expert curation. We further demonstrate the reliability of a trust validation  
32 filter for rejecting confounding input generated by spammers. Crowdsourcing was found  
33 to be as accurate as expert annotation, with an accuracy >90% for the annotation of a  
34 diverse test set of ARGs. ARG-miner provides a public API and database available at  
35 <http://bench.cs.vt.edu/argminer>.

## 36 INTRODUCTION

37 Antimicrobial resistance (AMR) has been identified by the World Health Organization  
38 (WHO) as a major global health threat. It is projected that AMR will increase  
39 exponentially by 2050, leading to substantial human morbidity and mortality (1,2).  
40 Therefore, swift action is required to enable enhanced monitoring and help tackle the  
41 spread of AMR, including: understanding the mechanisms controlling dissemination of  
42 antibiotic resistance genes (ARGs) via environmental sources and pathways (3-5),  
43 discovering novel and newly evolved ARGs before they are found to be problematic in  
44 the clinic (6), developing new computational strategies for ARG annotation (7-11), and  
45 expansion of current ARG repositories (7,9).

46

47 Metagenomics-based approaches have proved to be a powerful means of accessing  
48 the diverse array of ARGs, or “resistomes,” (12) characteristic of various environments  
49 (13-16) and has supported the discovery of novel ARGs and their interactions (17,18).  
50 Metagenomic data can be expressed in terms of “total ARGs” or can be further mined  
51 for ARGs corresponding to specific antibiotics or mechanisms of interest. However,  
52 existing metagenomics approaches are largely dependent upon predicting the antibiotic  
53 resistance attributes through sequence similarity computation, which is subject to major  
54 limitations. First, such similarity computations require a high quality and up-to-date ARG  
55 reference/annotation database to enable consistent and accurate ARG identification.  
56 Second, the scope of these kinds of analyses is limited to previously characterized  
57 ARGs, either due to the parameter cutoff stringency employed in the sequence  
58 alignment or to lack of a comprehensive target gene for alignment (10).

59  
60 To improve the capacity of metagenomic-based approaches to broadly and accurately  
61 detect the full range of ARGs present in a given sample, it is necessary to continuously  
62 expand and improve curation of corresponding databases (7). However, risk of  
63 incorporation of false positives, i.e., “ARG-like” genes that do not necessarily induce an  
64 AMR phenotype, stands as a major impediment to expanded curation efforts. Therefore,  
65 inspection and validation of new ARG entries is a critical aspect of ensuring the validity  
66 of AMR databases and their application. Manual curation of ARGs is typically carried  
67 out by a few researchers associated with particular laboratories. This process can be  
68 complex, tedious, and time-consuming. For instance, the last update of the Antibiotic  
69 Resistance Database (ARDB) was in 2009 (19) and therefore it does not contain any

70 newly discovered ARGs, such as *bla*<sub>NDM-1</sub> or *mcr-1*. The MEGARes database (9), which  
71 was designed to simplify the organization of ARG annotation, has not been updated  
72 since December, 2016. The SARGs database (10), which integrated genes available  
73 from the Comprehensive Antibiotic Resistance Database (CARD) and ARDB, has not  
74 had any update since its first release on August, 2016. In addition, the SARGs database  
75 is closed to the public, which limits its use and prevents integration with additional  
76 databases and other applications. Similarly, the resqu database, which contains genes  
77 for which there is evidence of having been transferred via Mobile Genetic elements  
78 (MGEs), has not been updated since 2013 (20) and it is also closed to the public,  
79 limiting its use. Further, the ARG-ANNOT resource (21), released in 2014, was updated  
80 most recently in March 2017. In summary, only a handful of ARG databases have been  
81 maintained and updated, albeit infrequently.

82

83 We recently introduced the Deep learning Antibiotic Resistance Gene DataBase  
84 (DeepARG-DB) (7) (first released in July, 2017 and most recently updated August,  
85 2017), which employs manual curation, literature review, and computational-based  
86 annotation. The CARD database (11), perhaps the most up-to-date ARG resource, was  
87 most recently updated in October 2017 and, since its first major upgrade in 2016, it has  
88 been updated a total of 21 times with changes to the ARG sequences and metadata  
89 (e.g., antibiotic class, gene name, and mechanism). The multiple updates of CARD  
90 illustrate how complex and time-consuming this task can be, even for domain experts.  
91 Another problem that encompasses all ARG resources is the lack of a standardized  
92 nomenclature. For instance, the gene *aadA1* is also named ANT(3'')-I, the *BacA* gene is

93 also named UppP, and the *tet(A)* gene can be found as TetA and tetA, depending on  
94 the ARG resource. On the other hand, most ARG databases contain approximately  
95 4,000 genes, with the exception of DeepARG, which contains approximately 15,000  
96 genes. For DeepARG-DB database, even a simple manual curation is essentially an  
97 impossible task.

98  
99 Another major concern in AMR research is the identification of mechanisms for the  
100 ARGs mobility within and among bacterial species (22). In this aspect, Mobile Genetic  
101 Elements (MGEs) have been recognized as a major player that facilitates the  
102 transmission of ARGs via horizontal gene transfer. For instance, it has been found that  
103 plasmids are responsible for the transmission of particular beta-lactamase resistance  
104 genes (*bla*<sub>TEM-52B</sub>, *bla*<sub>TEM-52C</sub>, *bla*<sub>KPC</sub>) among different bacterial strains (23) (24). Thus, it  
105 is important to detect ARGs that have the potential of being transferred by MGEs.

106  
107 To overcome the difficulties in curation and manual validation of an extensive number of  
108 ARGs, a novel approach that breaks down this complex task into simpler and smaller  
109 microtasks is proposed. The core of this methodology consists of a compendium of  
110 AMR resources and a crowdsourcing strategy, which simplifies the ARG information to  
111 allow nonexperts, the general public, and domain experts collectively to execute  
112 curation of the ARG database.

113  
114 Application of crowdsourcing in biology, particularly for data curation, is not new and  
115 comprises a variety of areas including: name entity recognition (NER) for drug and

116 diseases (25-27), identification of medically-relevant terms from patient online posts  
117 (28), annotation of diseases described in PubMed (29), systematic examination of  
118 databases and other resources for drug indications, biomedical ontologies and gene-  
119 disease interactions (26,30-33), identification of the relationship between genes and  
120 mutations (34), and annotation of medical data for electronic health records (35).  
121 Interestingly, in most of the studies, crowdsourcing has proven to be as effective as  
122 expert curation (26,36).

123 Here we introduce an online platform for the manual curation of ARGs. The system,  
124 called ARG-miner, enables users to curate and retrieve all the information available  
125 from several ARG resources including the DeepARG-DB (7), CARD (11), ARDB (19),  
126 MEGARes (9), and UniProt (37) databases. Moreover, to provide information on  
127 whether an ARG might be present in a pathogen, the PATRIC (38) database is used.  
128 ARG-miner provides evidence of ARGs that are potentially carried by MGEs, particularly  
129 plasmids, viruses or prophages. This information is obtained by looking at the gene  
130 sequences and metadata from the Classification of Mobile Genetic Elements database  
131 (ACLAME) (37). The ARG-miner platform is designed, built, and implemented as an  
132 open-source project facilitating a collaborative and integrative approach for the  
133 standardization of ARG annotation by the broader community of scientists and citizens  
134 with a desire to contribute towards combatting the spread of AMR. All data associated  
135 with ARG miner, as well as the source code, is available under a public repository  
136 accessed freely online at <http://bench.cs.vt.edu/argminer>.

## 137 **MATERIALS AND METHODS**

### 138 **ARG Database**

139 ARGs were downloaded from the following resources: CARD (11), which contains ARG  
140 information; the ARDB (19) database; which comprises a vast number of homology-  
141 predicted ARGs; DeepARG-DB (7), which integrates ARGs from UniProt (39), CARD,  
142 and ARDB; and the MEGARes (9) database, which incorporates genes from the ARG-  
143 ANNOT (21), RESFINDER (40), and the Lahey Clinic beta-lactamase archive (41)  
144 available from the National Center for Biotechnology Information (NCBI).

145

146 To obtain a clean collection of ARGs, the DeepARG-DB database was updated with the  
147 latest version of the CARD (v 1.1.8) and UniProt databases using their corresponding  
148 sequence identifiers. Discontinued UniProt sequences were removed from DeepARG-  
149 DB, whereas the newly-added ARGs from CARD were incorporated. Also, genes from  
150 CARD known to confer resistance due to single point mutations were removed. The  
151 resulting collection of ARGs was then aligned to the CARD, ARDB, and MEGARes  
152 databases using DIAMOND (42) and TBLASTN (43) to extract the best hit of each ARG  
153 along with its corresponding metadata. In this manner, each ARG is represented by its  
154 best hit to each database, upholding consistency in annotation among the ARG  
155 resources. Because DeepARG-DB contains information about the origin of the ARGs,  
156 the metadata from the UniProt database is accessed via the UniProt API (Application  
157 Programming Interface), which allows retrieval of up-to-date information for each gene.  
158 Therefore, each ARG is displayed in the user interface as a set of sections containing  
159 an ARG's best hits, its metadata, and the alignment quality. Scores are ranked

160 according to a color scale to enhance readability and human interpretation (see  
161 **Supplementary Figure S3-A**).

162

### 163 **Mobile Genetic Elements**

164 The ACLAME database (37) was used to identify ARGs that have potential of being  
165 mobilized by MGEs (plasmids, viruses, and phages). DIAMOND (42) was used to  
166 perform the comparison of ARGs to MGEs via sequence alignment (parameters e-value  
167  $< 1e-10$ ). Alignment information along with MGE metadata is presented in the interface  
168 for users to make a decision on whether an ARG has enough evidence of being carried  
169 by an MGE or not. This evidence is scored from 0 to 5. Color depicts the degree of  
170 confidence for the information presented in the MGE panel (see **Supplementary Figure**  
171 **S3-B**).

172

### 173 **Pathogens**

174 A total of 98,758 bacterial genomes were downloaded from the PATRIC (38) database.  
175 This database contains information about bacterial pathogenicity, antimicrobial  
176 resistance phenotype, corresponding diseases, and host organisms. The information is  
177 valuable for identifying ARGs that are present in pathogens. For instance, the gene  
178 entry BAE06009.1 was present in 2,037 bacterial genomes, of which, 1,004 belong to  
179 pathogenic bacteria, 40 are involved in cystic fibrosis disease in humans, and 706  
180 exhibit intermediate and resistant phenotypes (see **Supplementary Figure S3-C**). The  
181 collection of ARGs were then screened against the genome sequences from PATRIC  
182 using DIAMOND. To ensure the quality of the assignments, all genes with an identity



183 below 90% and an alignment coverage below 90% were discarded. Users are asked to  
184 rate the pathogenicity of known bacterial hosts of ARGs based on the evidence  
185 provided by PATRIC (frequency of pathogenic genomes, diseases, antimicrobial  
186 phenotype, and hosts).

187

### 188 **Annotation microtasks**

189 An annotation task consists of labeling ARGs based on the evidence provided on the  
190 web site. Users are requested to classify an ARG in terms of gene name, antibiotic  
191 class, and antibiotic mechanism. In addition, users are asked to rank the evidence of  
192 ARGs being carried by MGEs and pathogen genomes. A user-friendly web interface  
193 makes it easy to follow the annotation process. By employing simple tasks and a  
194 crowdsourcing strategy, ARG-miner advocates mass collaboration from an open  
195 community that includes experts and the general public.

196

### 197 **Expert gold standard data set**

198 To assess the accuracy and quality of classifications generated by crowd-sourcing,  
199 three domain experts who are actively engaged in shotgun metagenomic-based ARG  
200 research applied to various environments were asked to annotate a gold standard data  
201 set of 35 ARGs. Experts were required to annotate the ARGs by their name, antibiotic  
202 class, and mechanism. In total, 34 out of the 35 ARG annotations were in agreement  
203 among at least two of the three experts in terms of antibiotic class and gene name.  
204 These 34 ARGs were further considered in downstream analysis.

205

## 206 **Crowdsourcing microtasks**

207 Annotations were obtained using Amazon Mechanical Turk (MTurk), an online platform  
208 that allows access to a broad crowdsourcing audience to perform Human Intelligent  
209 Tasks (HITs). ARG-miner requests were submitted to MTurk in batches; crowdsourcing  
210 workers were requested without prior knowledge of ARGs. Then, once a worker  
211 performed a microtask, the system prompted a token number that workers needed to  
212 submit to the MTurk web site to validate the annotation and to obtain a monetary  
213 reward. Because of the high diversity of MTurk workers, the ARG-miner HITs were  
214 opened to a broad audience including domain experts and nonexperts. In addition,  
215 users were allowed to perform multiple annotations (maximum 20). Finally, workers  
216 were asked to indicate their expertise and confidence for each annotation performed.  
217 This information was used to score the individual ARG classifications (explained under  
218 **Section Annotation Score**). On the other hand, a diverse domain-knowledge group of  
219 workers were also evaluated; this group was consisted of students enrolled in a  
220 graduate-level microbiology class. Not all of them had antimicrobial resistance  
221 knowledge, but they were at least familiar with microbiology in general. While they did  
222 not receive a monetary reward, they were directed to follow the same instructions as the  
223 MTurk workers.

224

## 225 **User interface**

226 The ARG-miner interface has three main components or sections:

- 227 1. **Current Annotation**: comprises the known information available for an ARG. It  
228 consists of the gene name, antibiotic class, the database from which the

229 sequence was extracted, and number of times the gene has been inspected by  
230 workers/users (see **Figure 1A**).

231 2. **Evidence**: corresponds to the metadata available for the ARG as well as the best  
232 hit from the CARD, ARDB, and MEGARes databases. It also provides  
233 evidence/information on whether the gene is likely carried by an MGE (the  
234 ACLAME database) and whether the gene can be found in a pathogen genome  
235 (the PATRIC database, see **Figure 1B**).

236 3. **Microtask**: refers to the section where a worker/user enters his/her annotation.  
237 The information in this panel has to be consistent with the observations from the  
238 evidence. It comprises three simple steps. First, workers must validate the gene  
239 name, antibiotic class, and mechanism by looking at the Evidence section.  
240 Second, workers must rank the MGE and pathogen evidence. Third, workers  
241 must rank their annotation overall by scoring their expertise (how familiar are  
242 they with ARGs) and confidence (how strong is the evidence, see **Figure 1C**).

243  
244 The web interface provides a training step for new users that is mandatory for AMT  
245 workers (required for getting a monetary reward). The goal of this step is to familiarize  
246 the workers with the platform environment by performing two microtasks. ARG-miner  
247 also provides a list of problematic ARGs that have inconsistent annotation. These  
248 problematic ARGs are identified by comparing the annotation of the genes with their  
249 best hits from ARDB, CARD, and MEGARes. All tests performed during validation were  
250 completed using these problematic ARGs.

251

252 ARG-miner also provides an administrative interface to update the ARG database. This  
253 interface comprises a set of figures that show the distribution of different labels as well  
254 as the MGE and pathogenic evidence scores. In this interface, ARG-miner  
255 administrators are able to accept/reject the annotations made by the crowd and update  
256 the ARG database (see **Supplementary Figure S1**).

257

### 258 **Annotation score**

259 Each gene  $g_i$  is classified into three annotation fields ( $F_{\text{mechanism}}$ ,  $F_{\text{antibiotic category}}$  and  
260  $F_{\text{gene name}}$ ), where each field is composed by a list of labels  $L \in$   
261  $\{\text{mechanism}, \text{antibiotic category}, \text{gene name}\}$ . For example, the  $F_{\text{antibiotic category}}$  field  
262 contains the set of labels  $L_{\text{antibiotic category}}$  that corresponds to the name of the antibiotic  
263 categories (e.g., multidrug, beta-lactam, peptide, aminoglycoside). Thus, each gene  $g_i$   
264 contains a set of annotations  $A_{L^k}^{F_k}(g_i) = \{a_{l_1}^{F_k}, \dots, a_{l_p}^{F_k}\}$ , where  $p$  is the total number of  
265 labels, with each element  $a_{l_j}^{F_k}$  corresponding to the number of workers that assigned the  
266 label  $l_j$  to the gene  $g_i$ .

267

268 The ARG-miner score uses the majority voting strategy described in (44), but it is  
269 weighted by the evidence, expertise, and the validation scores. Therefore, the  
270 annotation score of the gene  $g_i$  for the label  $L_p$  of the field  $F_k$  (Eq 2) is calculated as  
271 follows:

272

$$273 \quad S_{F_k, L_p}^{g_i} = V_p * H_p * \frac{a_{L_p}^{F_k}}{\sum_p a_{L_p}^{F_k}}, \quad (1)$$

274 
$$H_p = \frac{\sum_p E_p * X_p}{25 * a_{L_p}^{F_k}}, (2)$$

275

276 
$$V_p = \frac{L_p \cap \Lambda}{L_p}, (3)$$

277 where

278  $H_p$  (Eq 2) describes the expertise ( $X_p$ ) and confidence ( $E_p$ ) scores normalized to the  
279  $[0,1]$  interval.  $V_p$  (Eq 3) computes the similarity between the label  $L_p$  and the gene  
280 evidence  $\Lambda$ .

281

## 282 **Trust validation filter**

283 Because of the unsupervised nature of crowdsourcing, users can provide erroneous  
284 feedback or just ignore the evidence and enter random inputs. Under an uncontrolled  
285 scenario, spammers can even get a monetary reward. More critically, too much random  
286 and/or erroneous feedback can increase the variance in ARG annotations and  
287 propagate annotation error. To circumvent the problem, ARG-miner implements a trust-  
288 validation filter and use the metric  $V_p$  (computed by Equation 3) to evaluate whether the  
289 input corresponds to real evidence or not.  $V_p$  is computed in real time, and, unless the  
290 user provides valid information, the system will not proceed to the next stage. **Figure 2**  
291 shows an example of a user providing erroneous input. The user entered *polyamine* as  
292 the antibiotic class, whereas the evidence shows that this gene belongs to the  
293 *polymyxin* antibiotic class. Despite the similarity between the two words, the system will  
294 not allow the submission until the answer has a minimum  $V_p$  score of 50 (50% of  
295 similarity) in the evidence section.

296

## 297 **RESULTS AND DISCUSSION**

298 To assess the effectiveness of the crowdsourcing approach for ARG annotation, three  
299 experiments were performed with the following contributes:

- 300 1. A set of crowdsourcing workers from MTurk, referred to as **AMT-Free**. In this  
301 scenario workers were paid \$0.10 for each annotation, with the trust validation  
302 filter disabled to examine the reliability of the crowd. Therefore, workers could  
303 input anything as feedback without restriction. A total of 100 annotations were  
304 requested on MTurk for this test.
- 305 2. A second batch of crowd workers from MTurk, referred to as **AMT-Val**. In this  
306 case the trust validation filter was enabled. The main purpose of this  
307 experimental group was to measure the effectiveness of the trust validation filter.  
308 In this scenario, workers were paid \$0.05 per annotation, with a total of 200  
309 requested annotations.
- 310 3. A group of users with general microbiological knowledge, with varying levels of  
311 experience in ARG research, referred to as **LAB**. This group comprises Masters  
312 and Ph.D. students from a microbiology class at Virginia Tech. They completed  
313 this work as an assignment and did not receive any monetary reward. Here the  
314 annotations were performed with the validation filter on and each worker was  
315 requested to perform 15 annotations (540 microtasks in total). The goal of the  
316 LAB scenario was to compare its performance against the nonexpert community  
317 of MTurk (AMT-Val, AMT-Free).

318

### 319 **Effectiveness of the trust validation filter**

320 “Spammers” are workers that intend to obtain monetary reward by submitting invalid  
321 information, which is a major confound of crowdsourcing. In the present study, although  
322 the ARG-miner website provides workers with detailed instructions on how to handle the  
323 annotation process, many of the **AMT-Free** workers submitted misleading and/or  
324 unrelated feedback. Particularly, for the antibiotic category annotation task, workers  
325 must choose the antibiotic class that they believe the gene belongs to from a dropdown  
326 menu that contains a list of antibiotic classes. Results indicated that many **AMT-Free**  
327 workers simply picked up the first option on the dropdown menu, most likely without  
328 reading the evidence section of the web page. Therefore, most of the antibiotic class  
329 annotations under the AMT-Free group were labeled as aminoglycosides. This is a  
330 serious hurdle to accurate database curation and indicates the need for a real time  
331 control that guarantees correctness of the annotation (see Section Trust validation  
332 filter). In terms of performance, as expected, the AMT-Free group achieved very low  
333 scores for all annotations (**Figure 3**). However, not all workers were spammers.  
334 Interestingly it was observed that workers who performed more than ten microtasks  
335 responded correctly and consistently to their observations and evidence. In addition,  
336 this test was designed with the aim to evaluate the impact of controlling the validity of  
337 the worker’s feedback and to check the performance of the proposed real time  
338 validation. Thus, after integration of the trust validation filter, MTurk workers were not  
339 allowed to input false annotations (see **Figure 3**). As a result, the performance of the  
340 AMT-Val workers improved significantly ( $p\text{-value} < 1e\text{-}10$ ) for all the fields (antibiotic  
341 class, ARG name, and ARG mechanism) over the AMT-Free group. Under the new

342 policy, MTurk workers were not allowed to continue with the microtask until their  
343 annotation was valid (the input was related to the evidence), as **Figure 2** shows. In this  
344 test, all nonsense input was completely removed, and all annotations from the AMT-Val  
345 group corresponded to actual ARG evidence. These results demonstrate the  
346 effectiveness of the trust validation filter for the control of spam annotations. In addition,  
347 it was imperative to test the performance of the MTurk workers against domain  
348 knowledge users. The main goal of this test case was to investigate whether a  
349 nonexpert crowd community (AMT-Val) can perform a complex task in a similar fashion  
350 to a group of workers with domain-knowledge (LAB). As expected, the LAB workers  
351 achieved a much higher average score (0.146) than the AMT-Free workers (0.06), but,  
352 surprisingly, a rather similar score to the AMT-Val workers (0.114). This shows that  
353 crowdsourcing is indeed a powerful alternative to manual inspection and annotation of  
354 ARGs. As expected, MTurk annotations (AMT-Val) had a higher variance compared to  
355 the LAB group in all annotation fields, but the two distributions are not significantly  
356 different (Kolmogorov-Smirnov test:  $p$ -value > 0.05).

357

### 358 **Effectiveness of the scoring strategy**

359 To evaluate the quality of the scoring strategy, four genes were selected among the  
360 total set of curated genes and examined in greater detail, as illustrated in Figure 4. For  
361 instance, the UniProt entry A0A0D0NPG2 is a bifunctional polymyxin resistance protein,  
362 ArnA, that is involved in several biological processes including coenzyme binding, UDP-  
363 glucuronic acid dehydrogenase activity, lipid A biosynthetic process, and response to  
364 antibiotic. This protein builds the UDP-L-4-formamido-arabinose attached to lipid A,



365 which is required for conferring resistance to polymyxin and cationic antimicrobial  
366 peptides (45). From the crowdsourcing classification, both peptide and polymyxin  
367 antibiotic classes were identified, where polymyxin was characterized by a slightly  
368 higher score (Figure 4A). A closer look at the evidence from the antibiotic resistance  
369 databases (CARD, ARDB, and MEGARes) reveals a consensus of the gene towards  
370 the polymyxin antibiotic class. As another example, the gene entry A0A127SI91 was  
371 inspected 62 times and found to belong to the beta-lactamase antibiotic class. This  
372 ARG was tagged as a novel, identified by Pehrsson et al. (17) in a study that analyzes  
373 linkages in antibiotic resistance exchange among different human environments. The  
374 evidence from the antibiotic resistance databases strongly suggests this gene as a bl1-  
375 EC beta lactamase gene. **Figure 4C** shows different crowd classifications (including all  
376 evaluation scenarios). Note that beta-lactam is the class with the highest score.  
377 However, as a consequence of disabling the trust validation filter, several unrelated  
378 categories were accepted, such as aminoglycoside, MLS, multidrug, nitrofurantoin,  
379 polyamine, polymyxin, and even the word “yes”. Fortunately, the scoring strategy was  
380 able to positively weight and assign the correct classification. One particularly  
381 interesting observation is the close proximity between valid annotations. For instance, in  
382 **Figure 4D**, the gene AAC76733.1 was correctly assigned to multidrug as its best  
383 classification and to the “multi-drug resistance” category as its second best  
384 classification. These small semantic differences are not detected by the trust validation  
385 filter. Therefore, under the validation interface, the administrators of ARG-miner have  
386 the ability to validate or reject the annotations if needed. **Figure 4B** shows that most

387 workers assigned the gene A0A0Q9QYU5 to the beta lactamase category. Note that the  
388 suggested name “beta\_lactam” is the highest scored among all choices.

389

390 **Figure 5** shows the crowdsourced score for the ARG name classification. As seen for  
391 the antibiotic category annotation, there are cases where the annotations are  
392 semantically close. For instance, the gene A0A127SI91 was tagged as bl1\_ec, bl1-ec,  
393 or blaec, all corresponding to the bla1-EC gene name (**Figure 5C**). Note that all these  
394 labels were ranked higher than the other gene names (macb, baca, ba1) and all the  
395 unrelated tags such as “mm-58”, “15”, “yes”, and “middle”. Also, all unrelated  
396 annotations were ranked low by the scoring strategy.

397

398 Although identification of the antibiotic category for the gene A0A0Q9QYU5 was  
399 straightforward, the detection of its gene name is challenging. Primarily, because the  
400 metadata of this entry does not include the gene name and because the identity of its  
401 best hit alignments is below 30%. This indicates that the gene has a potential homology  
402 to known ARGs. Two ARG databases (CARD and MEGARes) show a significant best  
403 hit e-value ( $<1e-22$ ) over the mecB gene. For this example, 50% of the workers  
404 annotated the gene as mecB whereas the other 50% annotated it as ash00\_000180.  
405 Also, workers yielded a higher confidence for the mecB gene (2.6 average confidence  
406 score) compared to the ash00\_000180 (2.3 average confidence score). As a result,  
407 mecB had a slightly higher scoring. To avoid uncertainty, ARG-miner recommends that  
408 users retain the original label if the evidence is not convincing. For the other examples

409 **(Figure 5A and 5D)**, the crowd classified the gene names according to the observed  
410 evidence.

411

412

### 413 **Annotation analysis**

414 To assess the accuracy of the crowdsourcing annotation, genes that were inspected by  
415 at least 10 workers were removed from the total pool of classified genes. A total of 35  
416 genes were identified and manually curated by three domain experts according to the  
417 *antibiotic class* and *gene name* annotation. It was found that experts achieved an  
418 annotation pairwise correlation of  $0.96 \pm 0.02$ , indicative of an almost perfect  
419 classification agreement. Thus, genes that were classified to the same label by at least  
420 two experts were used as the gold standard data set (see **Supplementary Table ST1**).  
421 This benchmark was then used to measure the performance of the crowdsourcing  
422 workers where labels were selected based on the greatest annotation score.

423

424 The crowdsourcing classification of the antibiotic classes was essentially just as  
425 accurate as the expert annotation (94% Positive Predicted Value - PPV). In other words,  
426 33 out of 35 genes labeled via crowdsourcing matched the expert classification (see  
427 **Supplementary Material 1**). The genes for which the workers failed to identify the  
428 correct antibiotic class were a quinolone ARG annotated as multidrug (YP\_001693238)  
429 and a multidrug gene annotated as quinolone (NP\_358469.1). On the other hand, the  
430 classification of the ARG names proved to be a challenging task. Indeed, experts did  
431 not fully agree about the correct name for five ARGs (see **Supplementary Table ST1**).

432 However, only one of those conflicting genes had a different classification from all three  
433 experts. This gene corresponded to a macrolide gene (AFU35065.1), which was tagged  
434 as: Isa, Isa-A, and Isa-E by the three experts. Thus, this gene entry was removed for  
435 the gene name analysis comparison and the final control data set contained 34 genes.  
436 When comparing the gene name annotation from the crowdsourcing workers, their  
437 prediction had a 97% PPV (see **Supplementary Material 2**). This indicates that only  
438 one gene was not correctly classified by the crowd (J2LT98). By examining the details  
439 of this gene in ARG-miner, all three ARG databases agreed that the gene belongs to  
440 the SHV group, with markedly high scores. However, CARD labeled it as the SHV  
441 variant 1 (SHV-1), ARDB labeled it as variant 2 (SHV-2), and MEGARes labeled it as  
442 the group SHV, without specification of a variant. An interesting aspect with respect to  
443 this particular ARG is that variants are defined by specific amino acid modifications (46),  
444 so these genes have a high identity and identifying the correct variant by using  
445 sequence alignment is a particularly difficult task, as shown in **Supplementary Figure**  
446 **S2**. This aspect has the potential to confuse workers when classifying genes that are  
447 very similar. Interestingly, by looking at the crowd results, workers were able to discard  
448 the SHV variant 2 (99.3% identity), but they were not able to differentiate between the  
449 SHV variant 1 and the SHV group (both have the same score). These results suggest  
450 that crowdsourcing workers are able to follow the correct track, even in the face of  
451 particularly complex tasks. Because of the risk of propagation errors, the updating  
452 process is not fully automated and administrator approval is required to approve/reject  
453 new classifications that will be updated in new database releases generated by ARG-  
454 miner. Overall the crowd exhibited performance comparable to that of the expert panel,

455 but in much less time. These results suggest that crowdsourcing annotation is a strong  
456 alternative to the classification and validation of ARGs.

457

### 458 **Expertise and confidence**

459 ARG-miner asks users to rate their own expertise in the analysis of ARGs on a scale of  
460 0 to 5. **Figure 6A** shows the distribution of the expertise score against the right or wrong  
461 annotations for the antibiotic category classification (including all scenarios: AMT-Free,  
462 AMT-VAL and LAB). Surprisingly, it is clear that having expert knowledge does not  
463 really make a difference in the quality of the classification. Indeed, because of the open  
464 nature of AMT, most of the workers are not experts and have little knowledge about  
465 ARGs. From Figure 6A, it is also evident that the proportion of correct annotations was  
466 higher compared to the incorrect classifications (the size of the dot indicates the number  
467 of annotations). This result suggests that accurate detection of the correct antibiotic  
468 resistance category does not necessarily require domain experts. On the other hand,  
469 workers were also required to rate their confidence in the annotation. Results show that  
470 self-rated confidence is a strong predictor for the quality of the annotation (**Figure 6B**).  
471 The distribution of the confidence score shows that higher confidence correlates with  
472 more accurate results. For instance, from the workers that rated their confidence with 5  
473 stars, 95% obtained a successful annotation and only 5% missed the correct  
474 classification. This strongly suggests the confidence score is a superior indicator of  
475 correct annotation than the expertise score.

476

## 477 **CONCLUSIONS**

478 Here we develop, launch, and validate a new web platform, ARG-miner, as a powerful  
479 system for advancing robust and comprehensive curation of publicly-available ARG  
480 database drawing from the power of crowdsourcing. ARG-miner enables access to key  
481 relevant information pertaining to ARGs, including up-to-date ARG metadata, evidence  
482 of ARGs being carried by pathogens, and the possibility of ARGs being mobilized by  
483 MGEs. Further, it enables a simple, but powerful, tool for the curation of ARGs designed  
484 to provide accurate information represented in a noncomplex way that can be validated  
485 by users without the requirement of domain knowledge. Results demonstrated that  
486 crowdsourcing workers are as accurate as experts in curating ARGs. However, it was  
487 found that implementation of a trust-validation filter was essential to overcome the  
488 potential for confounds introduced by “spammers” and other untrustworthy crowd  
489 workers. Incorporation of the trust-validation filter, which forces users to input data that  
490 is related to the evidence provided in the platform, was found to markedly improve  
491 accuracies of the annotations. Various scenarios, including comparison to individuals  
492 with specific ARG-expert domain and general microbiology-knowledge domain, along  
493 with a novel scoring strategy, were implemented to measure the efficiency of the crowd.  
494 The crowd workers were not only able to identify the correct ARG classifications and  
495 other relevant metadata, but were much more efficient than ARG-domain experts alone.  
496 Thus, ARG-miner opens the possibility of a truly comprehensive, accurate, and  
497 perpetually up-to-date publicly-available ARG database.

498

499

## 500 FUNDING

501 Funding was provided in part for this effort by the United States Department of  
502 Agriculture (USDA) – National Institute of Food and Agriculture (NIFA) Award # 2015-  
503 68003-2305 and # 2017-68003-26498 Effective Mitigation Strategies for Antimicrobial  
504 Resistance program, the National Science Foundation (NSF) Partnership in  
505 International Research and Education (PIRE) award #1545756, the Virginia Tech  
506 Institute for Critical Technology and Applied Science Center for the Science and  
507 Engineering of the Exposome (SEE) and the Virginia Tech Sustainable Nanotechnology  
508 Interdisciplinary Graduate Education Program (IGEP).

509

## 510 REFERENCES

- 511 1. O’Neill, J. (2016) Tackling drug-resistant infections globally: final report and  
512 recommendations. . *The review on antimicrobial resistance*.
- 513 2. Pires, D., de Kraker, M.E.A., Tartari, E., Abbas, M. and Pittet, D. (2017) ‘Fight Antibiotic  
514 Resistance—It’s in Your Hands’: Call From the World Health Organization for 5th May  
515 2017. *Clinical Infectious Diseases*, **64**, 1780-1783.
- 516 3. Pruden, A., Larsson, D.J., Amézquita, A., Collignon, P., Brandt, K.K., Graham, D.W.,  
517 Lazorchak, J.M., Suzuki, S., Silley, P. and Snape, J.R. (2013) Management options for  
518 reducing the release of antibiotics and antibiotic resistance genes to the environment.  
519 *Environmental health perspectives*, **121**, 878.
- 520 4. Martínez, J.L. (2008) Antibiotics and antibiotic resistance genes in natural environments.  
521 *Science*, **321**, 365-367.
- 522 5. Bengtsson-Palme, J., Kristiansson, E. and Larsson, D. (2017) Environmental factors  
523 influencing the development and spread of antibiotic resistance. *FEMS Microbiology*  
524 *Reviews*.
- 525 6. Berglund, F., Marathe, N.P., Österlund, T., Bengtsson-Palme, J., Kotsakis, S., Flach, C.-F.,  
526 Larsson, D.J. and Kristiansson, E. (2017) Identification of 76 novel B1 metallo- $\beta$ -  
527 lactamases through large-scale screening of genomic and metagenomic data.  
528 *Microbiome*, **5**, 134.
- 529 7. Arango-Argoty, G.A., Garner, E., Pruden, A., Heath, L.S., Vikesland, P. and Zhang, L.  
530 (2017) DeepARG: A deep learning approach for predicting antibiotic resistance genes  
531 from metagenomic data. *bioRxiv*, 149328.

- 532 8. Gibson, M.K., Forsberg, K.J. and Dantas, G. (2015) Improved annotation of antibiotic  
533 resistance determinants reveals microbial resistomes cluster by ecology. *ISME J*, **9**, 207-  
534 216.
- 535 9. Lakin, S.M., Dean, C., Noyes, N.R., Dettenwanger, A., Ross, A.S., Doster, E., Rovira, P.,  
536 Abdo, Z., Jones, K.L. and Ruiz, J. (2017) MEGARes: an antimicrobial resistance database  
537 for high throughput sequencing. *Nucleic acids research*, **45**, D574-D580.
- 538 10. Yang, Y., Jiang, X., Chai, B., Ma, L., Li, B., Zhang, A., Cole, J.R., Tiedje, J.M. and Zhang, T.  
539 (2016) ARGs-OAP: online analysis pipeline for antibiotic resistance genes detection from  
540 metagenomic data using an integrated structured ARG-database. *Bioinformatics*, **32**,  
541 2346-2351.
- 542 11. McArthur, A.G., Waglechner, N., Nizam, F., Yan, A., Azad, M.A., Baylay, A.J., Bhullar, K.,  
543 Canova, M.J., De Pascale, G. and Ejim, L. (2013) The comprehensive antibiotic resistance  
544 database. *Antimicrobial agents and chemotherapy*, **57**, 3348-3357.
- 545 12. Sello, J.K. (2012) Mining the antibiotic resistome. *Chemistry & biology*, **19**, 1220-1221.
- 546 13. Li, B., Chen, H., Su, J.-Q., Gillings, M.R., Chen, Q.-L., Zhang, T., An, X.-L. and Zhu, Y.-G.  
547 (2017) Metagenomics of urban sewage identifies an extensively shared antibiotic  
548 resistome in China. *Microbiome*, **5**, 84.
- 549 14. Garner, E., Wallace, J.S., Argoty, G.A., Wilkinson, C., Fahrenfeld, N., Heath, L.S., Zhang,  
550 L., Arabi, M., Aga, D.S. and Pruden, A. (2016) Metagenomic profiling of historic Colorado  
551 Front Range flood impact on distribution of riverine antibiotic resistance genes.  
552 *Scientific reports*, **6**, 38432.
- 553 15. Bengtsson-Palme, J., Hammarén, R., Pal, C., Östman, M., Björlenius, B., Flach, C.-F., Fick,  
554 J., Kristiansson, E., Tysklind, M. and Larsson, D.J. (2016) Elucidating selection processes  
555 for antibiotic resistance in sewage treatment plants using metagenomics. *Science of the*  
556 *Total Environment*, **572**, 697-712.
- 557 16. Pal, C., Bengtsson-Palme, J., Kristiansson, E. and Larsson, D.G. (2016) The structure and  
558 diversity of human, animal and environmental resistomes. *Microbiome*, **4**, 54.
- 559 17. Pehrsson, E.C., Tsukayama, P., Patel, S., Mejía-Bautista, M., Sosa-Soto, G., Navarrete,  
560 K.M., Calderon, M., Cabrera, L., Hoyos-Arango, W. and Bertoli, M.T. (2016)  
561 Interconnected microbiomes and resistomes in low-income human habitats. *Nature*,  
562 **533**, 212-216.
- 563 18. Forsberg, K.J., Patel, S., Gibson, M.K., Lauber, C.L., Knight, R., Fierer, N. and Dantas, G.  
564 (2014) Bacterial phylogeny structures soil resistomes across habitats. *Nature*, **509**, 612-  
565 616.
- 566 19. Liu, B. and Pop, M. (2008) ARDB—antibiotic resistance genes database. *Nucleic acids*  
567 *research*, **37**, D443-D447.
- 568 20. Bengtsson-Palme, J., Larsson, D.J. and Kristiansson, E. (2017) Using metagenomics to  
569 investigate human and environmental resistomes. *Journal of Antimicrobial*  
570 *Chemotherapy*, **72**, 2690-2703.
- 571 21. Gupta, S.K., Padmanabhan, B.R., Diene, S.M., Lopez-Rojas, R., Kempf, M., Landraud, L.  
572 and Rolain, J.M. (2014) ARG-ANNOT, a new bioinformatic tool to discover antibiotic  
573 resistance genes in bacterial genomes. *Antimicrob Agents Chemother*, **58**, 212-220.
- 574 22. Jitwasinkul, T., Suriyaphol, P., Tangphatsornruang, S., Hansen, M.A., Hansen, L.H.,  
575 Sorensen, S.J., Permpikul, C., Rongrungruang, Y. and Tribuddharat, C. (2016) Plasmid



- 576 metagenomics reveals multiple antibiotic resistance gene classes among the gut  
577 microbiomes of hospitalised patients. *J Glob Antimicrob Resist*, **6**, 57-66.
- 578 23. Carattoli, A., Bertini, A., Villa, L., Falbo, V., Hopkins, K.L. and Threlfall, E.J. (2005)  
579 Identification of plasmids by PCR-based replicon typing. *Journal of microbiological*  
580 *methods*, **63**, 219-228.
- 581 24. Song, X., Sun, J., Mikalsen, T., Roberts, A.P. and Sundsfjord, A. (2013) Characterisation of  
582 the plasmidome within *Enterococcus faecalis* isolated from marginal periodontitis  
583 patients in Norway. *PLoS One*, **8**, e62248.
- 584 25. Islamaj Dogan, R., Murray, G.C., Névél, A. and Lu, Z. (2009) Understanding PubMed®  
585 user search behavior through log analysis. *Database*, **2009**.
- 586 26. Khare, R., Good, B.M., Leaman, R., Su, A.I. and Lu, Z. (2015) Crowdsourcing in  
587 biomedicine: challenges and opportunities. *Briefings in bioinformatics*, **17**, 23-32.
- 588 27. Lu, Z., Kim, W. and Wilbur, W.J. (2009) Evaluation of query expansion using MeSH in  
589 PubMed. *Information retrieval*, **12**, 69-80.
- 590 28. MacLean, D.L. and Heer, J. (2013) Identifying medical terms in patient-authored text: a  
591 crowdsourcing-based approach. *Journal of the American Medical Informatics*  
592 *Association*, **20**, 1120-1127.
- 593 29. Good, B.M., Nanis, M., Wu, C. and Su, A.I. (2014), *Pacific Symposium on Biocomputing*  
594 *Co-Chairs*. World Scientific, pp. 282-293.
- 595 30. Wei, C.-H., Kao, H.-Y. and Lu, Z. (2013) PubTator: a web-based text mining tool for  
596 assisting biocuration. *Nucleic acids research*, **41**, W518-W522.
- 597 31. Wei, C.-H., Harris, B.R., Li, D., Berardini, T.Z., Huala, E., Kao, H.-Y. and Lu, Z. (2012)  
598 Accelerating literature curation with text-mining tools: a case study of using PubTator to  
599 curate genes in PubMed abstracts. *Database*, **2012**.
- 600 32. Arighi, C.N., Carterette, B., Cohen, K.B., Krallinger, M., Wilbur, W.J., Fey, P., Dodson, R.,  
601 Cooper, L., Van Slyke, C.E. and Dahdul, W. (2013) An overview of the BioCreative 2012  
602 Workshop Track III: interactive text mining task. *Database*, **2013**.
- 603 33. Lu, Z. and Hirschman, L. (2012) Biocuration workflows and text mining: overview of the  
604 BioCreative 2012 Workshop Track II. *Database*, **2012**.
- 605 34. Burger, J.D., Doughty, E., Khare, R., Wei, C.-H., Mishra, R., Aberdeen, J., Tresner-Kirsch,  
606 D., Wellner, B., Kann, M.G. and Lu, Z. (2014) Hybrid curation of gene–mutation relations  
607 combining automated extraction and crowdsourcing. *Database*, **2014**.
- 608 35. Cocos, A., Qian, T., Callison-Burch, C. and Masino, A.J. (2017) Crowd control: Effectively  
609 utilizing unscreened crowd workers for biomedical data annotation. *Journal of*  
610 *Biomedical Informatics*, **69**, 86-92.
- 611 36. Good, B.M. and Su, A.I. (2013) Crowdsourcing for bioinformatics. *Bioinformatics*, **29**,  
612 1925-1933.
- 613 37. Leplae, R., Hebrant, A., Wodak, S.J. and Toussaint, A. (2004) ACLAME: a CLAssification of  
614 Mobile genetic Elements. *Nucleic acids research*, **32**, D45-D49.
- 615 38. Wattam, A.R., Abraham, D., Dalay, O., Disz, T.L., Driscoll, T., Gabbard, J.L., Gillespie, J.J.,  
616 Gough, R., Hix, D., Kenyon, R. *et al.* (2014) PATRIC, the bacterial bioinformatics database  
617 and analysis resource. *Nucleic Acids Res*, **42**, D581-591.
- 618 39. Consortium, U. (2014) UniProt: a hub for protein information. *Nucleic acids research*,  
619 gku989.

- 620 40. Zankari, E., Hasman, H., Cosentino, S., Vestergaard, M., Rasmussen, S., Lund, O.,  
621 Aarestrup, F.M. and Larsen, M.V. (2012) Identification of acquired antimicrobial  
622 resistance genes. *J Antimicrob Chemother*, **67**, 2640-2644.
- 623 41. Bush, K. and Jacoby, G.A. (2010) Updated functional classification of  $\beta$ -lactamases.  
624 *Antimicrobial agents and chemotherapy*, **54**, 969-976.
- 625 42. Buchfink, B., Xie, C. and Huson, D.H. (2015) Fast and sensitive protein alignment using  
626 DIAMOND. *Nature methods*, **12**, 59-60.
- 627 43. Gertz, E.M., Yu, Y.-K., Agarwala, R., Schäffer, A.A. and Altschul, S.F. (2006) Composition-  
628 based statistics and translated nucleotide searches: improving the TBLASTN module of  
629 BLAST. *BMC biology*, **4**, 41.
- 630 44. Prill, R.J., Saez-Rodriguez, J., Alexopoulos, L.G., Sorger, P.K. and Stolovitzky, G. (2011)  
631 Crowdsourcing network inference: the DREAM predictive signaling network challenge.  
632 *Science signaling*, **4**, mr7.
- 633 45. Huja, S., Oren, Y., Trost, E., Brzuszkiewicz, E., Biran, D., Blom, J., Goesmann, A.,  
634 Gottschalk, G., Hacker, J. and Ron, E.Z. (2015) Genomic avenue to avian colisepticemia.  
635 *MBio*, **6**, e01681-01614.
- 636 46. Paterson, D.L., Hujer, K.M., Hujer, A.M., Yeiser, B., Bonomo, M.D., Rice, L.B. and  
637 Bonomo, R.A. (2003) Extended-spectrum  $\beta$ -lactamases in *Klebsiella pneumoniae*  
638 bloodstream isolates from seven countries: dominance and widespread prevalence of  
639 SHV-and CTX-M-type  $\beta$ -lactamases. *Antimicrobial agents and chemotherapy*, **47**, 3554-  
640 3560.

641

642

## 643 FIGURES

644

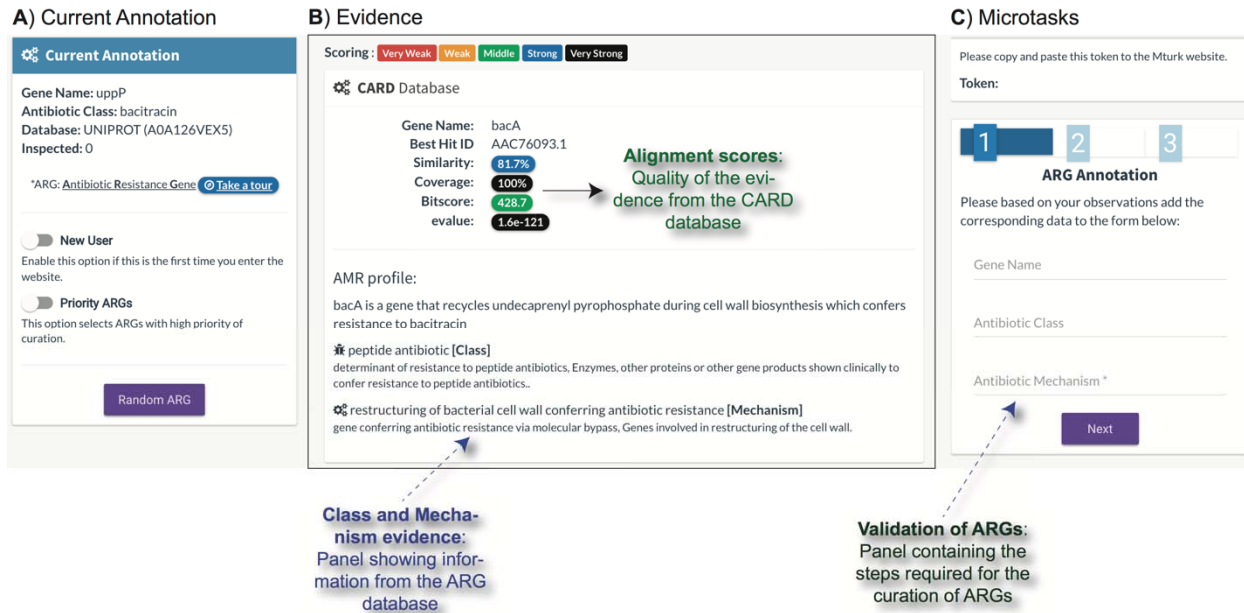

645  
646 **Figure 1:** General overview of the ARG-miner platform. A) Current annotation. This panel  
647 contains the current information available for the ARG entry that requires validation. B)  
648 Evidence. This is the main panel and provides all of the metadata and information extracted from  
649 the different databases and resources. Note that in this panel there are colors that describe the  
650 relevance of each scoring metric. This is useful for users that are not familiar with alignment  
651 scores. C) Microtasks. This section contains the three microtasks needed for the ARG curation. It  
652 also contains real-time validation, which prompts error messages if the user inputs errors.  
653

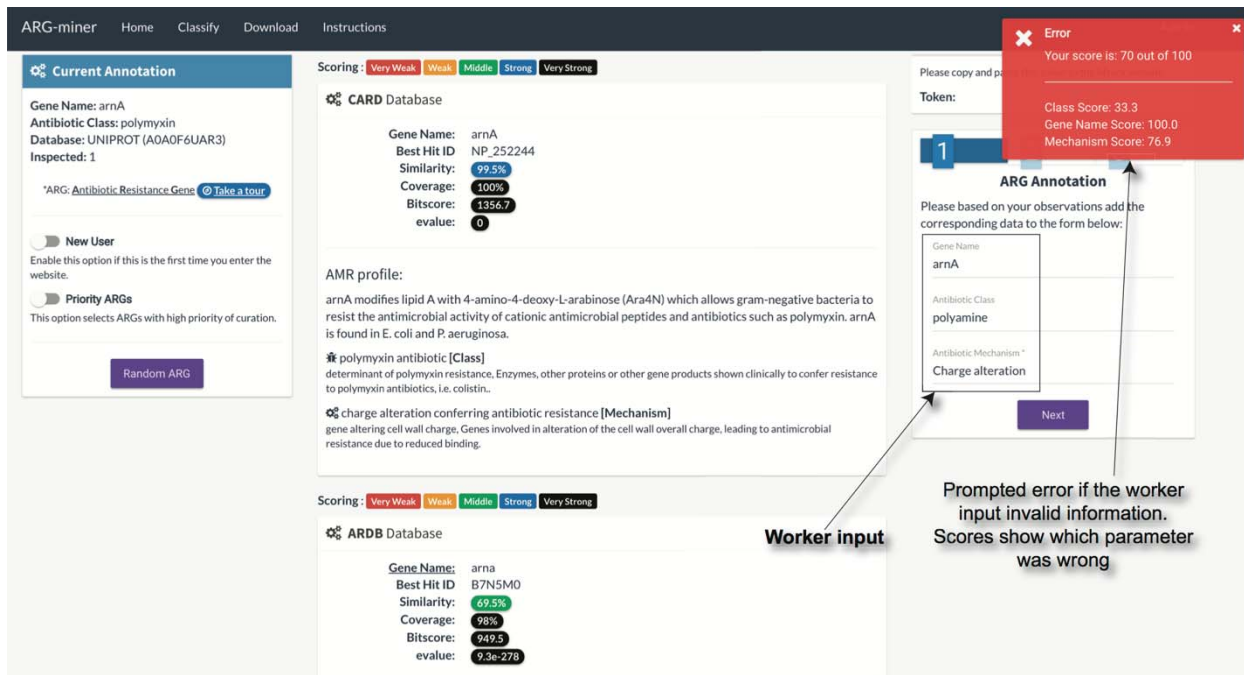

654  
655 **Figure 2:** Trust validation strategy. The system rejects all inputs that are not consistent with the  
656 evidence. For instance, the antibiotic class *polyamine* does not correspond to the actual antibiotic  
657 class.

658

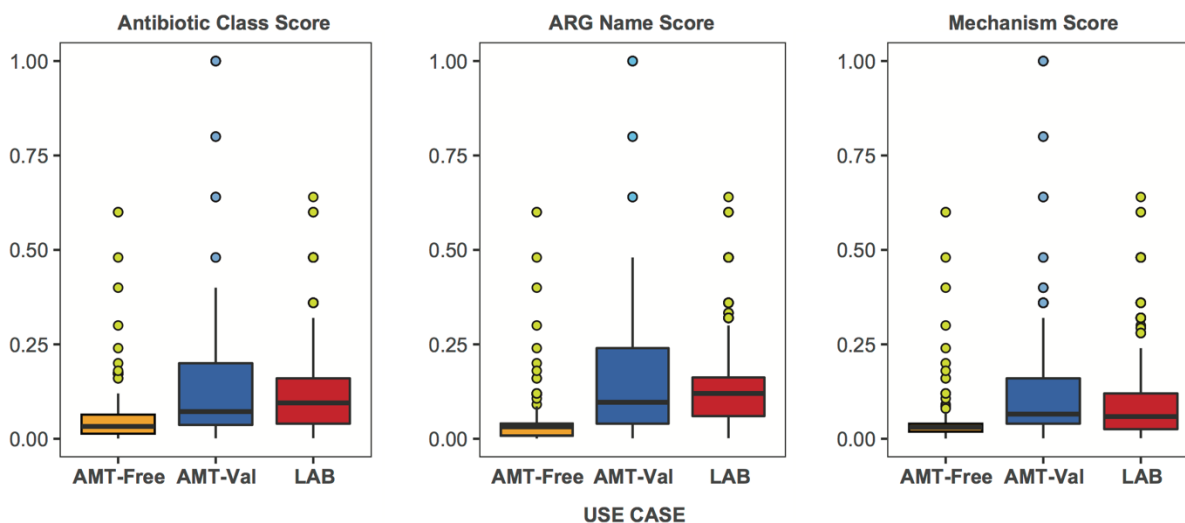

659  
 660 **Figure 3:** Annotation score of the three crowdsourced use cases (AMT-Free: Amazon MTurk  
 661 workers without the true validation filter, AMT-Val: Amazon MTurk workers with the validation  
 662 filter enabled and LAB: a group of workers with general microbiology domain knowledge and  
 663 some antibiotic resistance knowledge. AMT-Val displayed the highest variance. However, this  
 664 distribution was closer to that obtained by the workers with domain knowledge. Scores from the  
 665 AMT-Free workers were the lowest among the three scenarios, indicating the ineffectiveness of  
 666 the crowdsourcing annotation when the worker’s input was not validated.  
 667

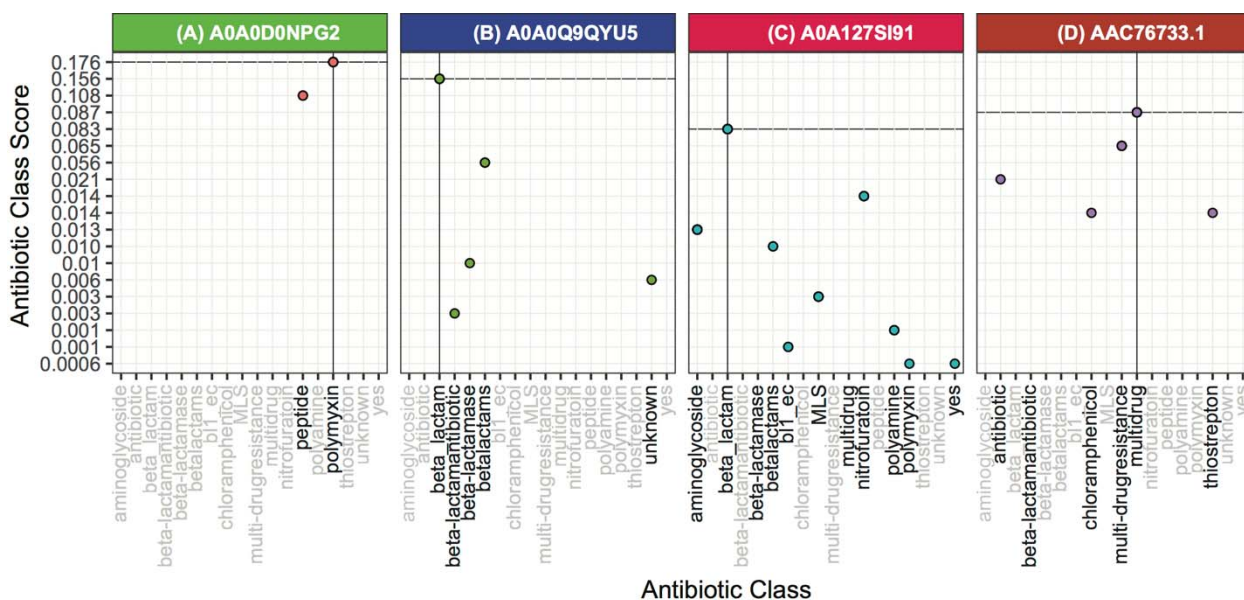

668  
 669 **Figure 4:** Distribution of the antibiotic class annotation by the crowdsourcing workers using the  
 670 annotation score. X axis corresponds to the antibiotic resistance categories, where black labels  
 671 indicate the categories reported by the workers and the top of each box corresponds to the ARG  
 672 identifier.  
 673

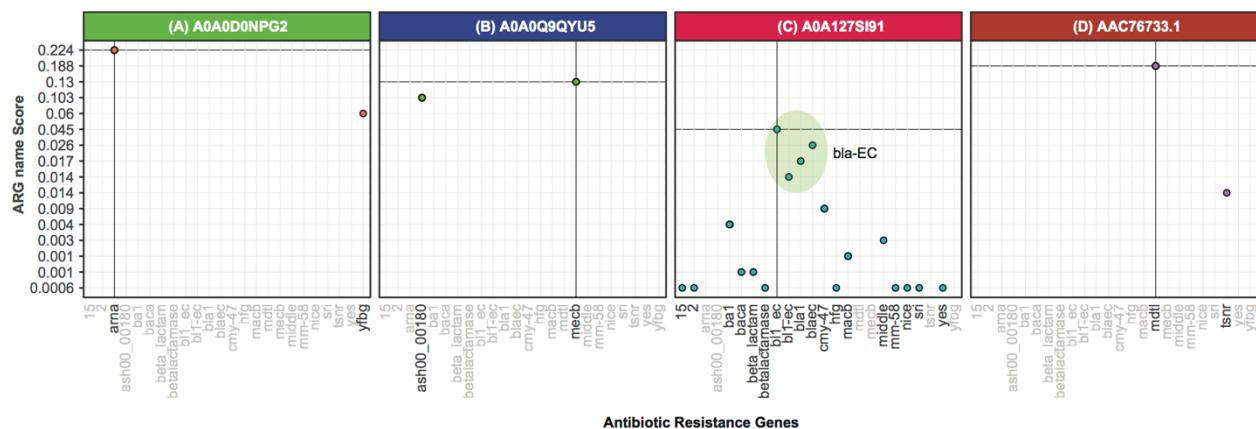

674  
675 **Figure 5:** Distribution of the prediction of ARG names. ARG names are represented on the x  
676 axis and the y axis indicates the corresponding annotation score. The top of each box  
677 corresponds to the ARG identifier.  
678

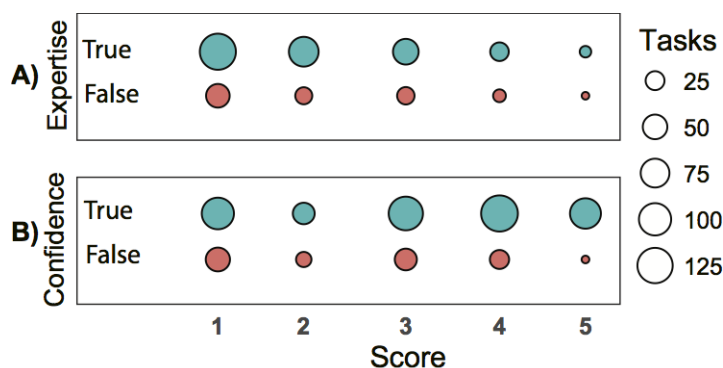

679  
680 **Figure 6:** Expertise and confidence levels of the workers. The size of the points indicates the  
681 number of tasks; the x axis corresponds to the score level and the y label shows the expertise and  
682 confidence parameters. Color depicts correct and incorrect classifications.  
683

684 **Supplementary Figure S1:** Administrator interface. This interface contains the elements to  
685 update a single ARG (accept/reject annotations from the crowd) as well as the main tools for  
686 releasing a new version of the database and to compute the ARGs that have conflicting  
687 annotations. This process is recommended to make ensure the annotations are valid.  
688

689 **Supplementary Figure S2:** Case study of data provided by ARG-miner for the gene J2LT98.  
690 This gene represents a difficult ARG naming and annotation case. First, it has been identified in  
691 three major databases with an alignment coverage below 90% indicating genomic variability.  
692 Second, all three databases indicate a high bitscore and percentage of identity that can potentially  
693 confuse the user.

694 **Supplementary Figure S3:** ARG-miner evidence. A) Color scale describes the quality of the  
695 evidence from very weak (yellow) to very strong (black). B) Evidence of the ARG being carried  
696 by a MGE. This panel shows the alignment scores and the number of MGEs carrying the ARG.  
697 C) pathogen evidence, this panel illustrates the evidence of the ARG being carried by a  
698 pathogenic genome. More detailed information is also provided by ARG-miner, such as diseases  
699 and antimicrobial resistance phenotype.  
700

701 **Supplementary Material 1:** Antibiotic classification of all gene entries from the expert  
702 validated dataset.

703  
704 **Supplementary Material 2:** Antibiotic resistance names annotation of all gene entries from the  
705 expert validated dataset.

706  
707 **Supplementary Table ST1:** Curated dataset from the three experts (A, B and C). This table  
708 shows the classification of the ARG name and Antibiotic category.

709  
710  
711  
712  
713  
714  
715  
716  
717  
718  
719
