# Supplementary material for: ARGminer: A web platform for crowdsourcing-based curation of antibiotic resistance genes
Source: bioRxiv or medRxiv preprint supplement (doi:10.1101/274282), 2019-03-06
Supplement: Supplementary file [file 274282-2.pdf]

## Upgrade database

Publish a new version of the ARG-miner database. This database is updated once a considered number of genes have been curated. Once you click submit it will create a new version of the database and update the download links under the Downloads tab.

Database version

Comments

Don't disclose personal info

0 / 256

Upgrade ARG-miner database

\*The upgrading gets run in the background of the web server and the fasta file will be available under the downloads once the process is done.

## Recompute Problematic Annotations

Use this tool after you have accepted/rejected annotations from the crowdsourcing platform. This action will compute/update all those ARGs that have conflicting annotations e.g., the same gene name associated to several ARG categories.

Compute Problematic ARGs

Search term

## Panel with the current information and weighted crowdsourcing annotation

notation

Current Annotation

Gene ID: BAC11911.1  
ARG Name: emeA  
Gene Class: multidrug  
ARG Database: CARD

Weighted Annotation

ARG Name: emea  
Gene Class: multidrug  
ARG Mechanism: multi-drug efflux pumps  
MGES Evidence Score: 1.88  
Pathogenic Evidence Score: 1.31

## Upgrading and updating of ARGs and database

Update Gene

Next Gene

## Crowdsourced Annotation

Antibiotic Class

This panel shows the distribution of the crowdsourced antibiotic classes for the gene BAC11911.1

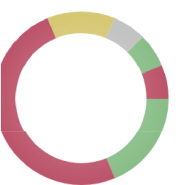

Total  
16

3 multi-drug resistance  
19%

8 multidrug  
50%

2 multidrug  
13%

1 quinolone  
6.25%

1 antimicro  
6.25%

| ARG Class             | Confidence Score | Expertise Score | Score (Cs+1.2*Es) |
|-----------------------|------------------|-----------------|-------------------|
| multi-drug resistance | 0.38             | 0.25            | 0.68              |
| multidrug             | 1.81             | 1.19            | 3.24              |
