# Supplementary material for: ARGminer: A web platform for crowdsourcing-based curation of antibiotic resistance genes
Source: bioRxiv or medRxiv preprint supplement (doi:10.1101/274282), 2019-03-06
Supplement: Supplementary file [file 274282-3.pdf]

Scoring : **Very Weak** **Weak** **Middle** **Strong** **Very Strong**

#### 🔧 CARD Database

Gene Name: SHV-1  
Best Hit ID ACR66323.1  
Similarity: **100%**  
Coverage: **89%**  
Bitscore: **556.6**  
value: **6e-160**

#### AMR profile:

SHV-1 is a broad-spectrum beta-lactamase found in *Klebsiella* spp., as well as *Acinetobacter* spp., *E. coli*, *Raoultella terrigena*, and *Yersinia pestis*.

antibiotic inactivation enzyme. Enzyme that catalyzes the inactivation of an antibiotic resulting in resistance. Inactivation includes chemical modification, destruction, etc...

🔧 antibiotic inactivation enzyme [Mechanism]

🔧 beta-lactam antibiotic [Class]  
determinant of beta-lactam resistance. Enzymes, other proteins or other gene products shown clinically to confer resistance to beta-lactam antibiotics.

Scoring : **Very Weak** **Weak** **Middle** **Strong** **Very Strong**

#### 🔧 megares Database

Gene Name: SHV  
Best Hit ID g|1291621298|dbj|AB551737.1|be  
Similarity: **99.66%**  
Coverage: **88.82%**  
Bitscore: **587**  
value: **0**

#### AMR profile:

Antibiotic Class: betalactams

Gene Name: SHV

Antibiotic Mechanism: Class A betalactamases

Scoring : **Very Weak** **Weak** **Middle** **Strong** **Very Strong**

#### 🔧 ARDB Database

Gene Name: b|2|be\_shv2  
Best Hit ID P30896  
Similarity: **99.3%**  
Coverage: **89%**  
Bitscore: **551.6**  
value: **27e-158**

#### AMR profile:

Class A beta-lactamase. This enzyme breaks the beta-lactam antibiotic ring open and deactivates the molecule's antibacterial properties.

**e\_**cephalosproiin

**monobactam**

**n\_**cephalosproiin

**penicillin**

A group of antibiotics that contain 6-aminopenicillanic acid with a side chain attached to the 6-amino group. The penicillin nucleus is the chief structural requirement for biological activity. The side-chain structure determines many of the antibacterial and pharmacological characteristics. (Goodman and Gilman's The Pharmacological Basis of Therapeutics, 8th ed, p1065)
